# Supplementary material for: C-C Motif Ligand 20 (CCL20) and C-C Motif Chemokine Receptor 6 (CCR6) in Human Peripheral Blood Mononuclear Cells: Dysregulated in Ulcerative Colitis and a Potential Role for CCL20 in IL-1β Release
Source: MDPI journal article supplement (doi:10.3390/ijms19103257), 2018-10-20
Supplement: s1 [file s1]

**Table S1** Main Lymphocyte and Monocyte Populations with CCR6<sup>+</sup> Cells.

|                                     |     | N          | UCa        | UCi        | CDa       | CDi        | Sign.                                  |
|-------------------------------------|-----|------------|------------|------------|-----------|------------|----------------------------------------|
| Number of subjects                  |     | 8          | 6          | 10         | 8         | 8          | -                                      |
| CD4 <sup>+</sup>                    | FOP | 43±7.8     | 45±9.7     | 43±7.5     | 47±13.7   | 45±5.9     | n.s                                    |
|                                     | MFI | 4577±490   | 4565±599   | 4683±451   | 4551±552  | 4435±310   | n.s                                    |
| CD8a <sup>+</sup>                   | FOP | 24±8.4     | 27±6.8     | 24±8.2     | 21±8.0    | 24±9.2     | n.s                                    |
|                                     | MFI | 13906±1040 | 13571±1513 | 14070±1265 | 14000±960 | 13967±1472 | n.s                                    |
| CD14 <sup>+</sup>                   | FOP | 35±11.8    | 33±7.6     | 35±7.1     | 38±9.5    | 34±12.8    | n.s                                    |
|                                     | MFI | 7293±584   | 7239±1301  | 7826±659   | 7581±621  | 7495±283   | n.s                                    |
| CD16 <sup>+</sup>                   | FOP | 14±8.0     | 12±7.1     | 15±6.9     | 15±10.5   | 14±9.0     | n.s                                    |
|                                     | MFI | 2551±600   | 2638±533   | 2125±595   | 2329±716  | 2285±652   | n.s                                    |
| CD19 <sup>+</sup>                   | FOP | 4.9±1.5    | 4.5±1.8    | 5.7±1.4    | 5.8±2.3   | 5.3±1.8    | n.s                                    |
|                                     | MFI | 3710±319   | 3600±278   | 3777±331   | 3683±453  | 3704±593   | n.s                                    |
| CCR6 <sup>+</sup> CD4 <sup>+</sup>  | FOP | 13.1±8.5   | 7.4±4.4    | 14.6±6.8   | 10.5±7.4  | 8.2±4.3    | UCa vs UCI p=0.038                     |
|                                     | MFI | 748±185    | 697±143    | 793±185    | 722±151   | 676±122    | n.s                                    |
| CCR6 <sup>+</sup> CD8 <sup>+</sup>  | FOP | 4.2±3.9    | 1.4±0.8    | 2.8±1.9    | 4.5±3.7   | 2.7±1.4    | UCa vs N p=0.043<br>UCa vs CDa p=0.029 |
|                                     | MFI | 429±106    | 379±195    | 447±125    | 391±79    | 423±122    | n.s                                    |
| CCR6 <sup>+</sup> CD14 <sup>+</sup> | FOP | 1.0±0.9    | 1.0±0.5    | 0.8±0.4    | 1.0±0.5   | 0.8±0.5    | n.s                                    |
|                                     | MFI | 789±321    | 795±181    | 1106±846   | 831±353   | 710±172    | n.s                                    |
| CCR6 <sup>+</sup> CD16 <sup>+</sup> | FOP | 0.4±0.4    | 0.3±0.2    | 0.4±0.5    | 0.5±0.4   | 0.3±0.2    | n.s                                    |
|                                     | MFI | 325±173    | 431±291    | 471±354    | 682±986   | 432±429    | n.s                                    |
| CCR6 <sup>+</sup> CD19 <sup>+</sup> | FOP | 90±6.0     | 87±11.3    | 92±8.8     | 91±8.5    | 86±16.5    | n.s                                    |
|                                     | MFI | 1023±301   | 1072±429   | 1173±326   | 1058±364  | 961±327    | n.s                                    |

CCR6<sup>+</sup> population within CD4<sup>+</sup> lymphocytes, CD8<sup>+</sup> lymphocytes, CD16<sup>+</sup> NK cells, CD19<sup>+</sup> lymphocytes, and CD14<sup>+</sup> monocytes. Frequency of parental (FOP) and Mean Fluorescent Intensity (MFI) is given in mean with standard deviation in the disease groups healthy controls (N), active ulcerative colitis (UCa), active Crohn's disease (CDa), inactive UC (UCi) and inactive CD (CDi). n.s: not significant.
